# Supplementary material for: Potential benefits of mesenchymal stem cells and electroacupuncture on the trophic factors associated with neurogenesis in mice with ischemic stroke
Source: PubMed Central journal article supplement (PMC5794924; doi:10.1038/s41598-018-20481-3), 2018-02-01
Supplement: 41598_2018_20481_MOESM1_ESM.pdf [file 41598_2018_20481_MOESM1_ESM.pdf]

## Supplementary Information

### **Potential benefits of mesenchymal stem cells and electroacupuncture on the trophic factors associated with neurogenesis in mice with ischemic stroke**

Yu Ri Kim<sup>1,2</sup>, Sung Min Ahn<sup>2</sup>, Malk Eun Pak<sup>1,3</sup>, Hong Ju Lee<sup>1,3</sup>, Da Hee Jung<sup>1,3</sup>, Yong-Il Shin<sup>4</sup>,  
Hwa Kyoung Shin<sup>1,2,3,5</sup>, Byung Tae Choi<sup>1,2,3,5\*</sup>

<sup>1</sup>Department of Korean Medical Science, School of Korean Medicine, Pusan National University, Yangsan 50612, Republic of Korea

<sup>2</sup>Korean Medical Science Research Center for Healthy Aging, Pusan National University, Yangsan 50612, Republic of Korea

<sup>3</sup>Graduate Training Program of Korean Medicine for Healthy Aging, School of Korean Medicine, Pusan National University, Yangsan 50612, Republic of Korea

<sup>4</sup>Department of Rehabilitation Medicine, School of Medicine, Pusan National University, Yangsan 50612, Republic of Korea

<sup>5</sup>Division of Meridian and Structural Medicine, School of Korean Medicine, Pusan National University, Yangsan 50612, Republic of Korea

\*Correspondence and requests for materials should be addressed to B.T.C. (email: [choibt@pusan.ac.kr](mailto:choibt@pusan.ac.kr))

## Supplementary Information Figures

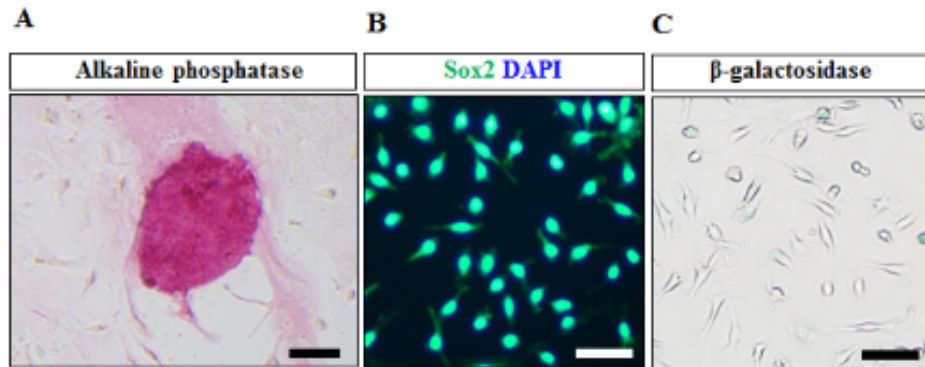

**Fig. S1. Assessment of alkaline phosphatase, SOX2, and  $\beta$ -galactosidase activity in cultured mBMSCs obtained at passage 3.** Phenotypic characteristics of stem cells were confirmed by (A) alkaline phosphatase and (B) SOX2 staining in cultured mBMSCs. (C) Senescence-associated  $\beta$ -galactosidase staining shown by blue granules was hardly seen in most mBMSCs. Scale bars=50  $\mu$ m.

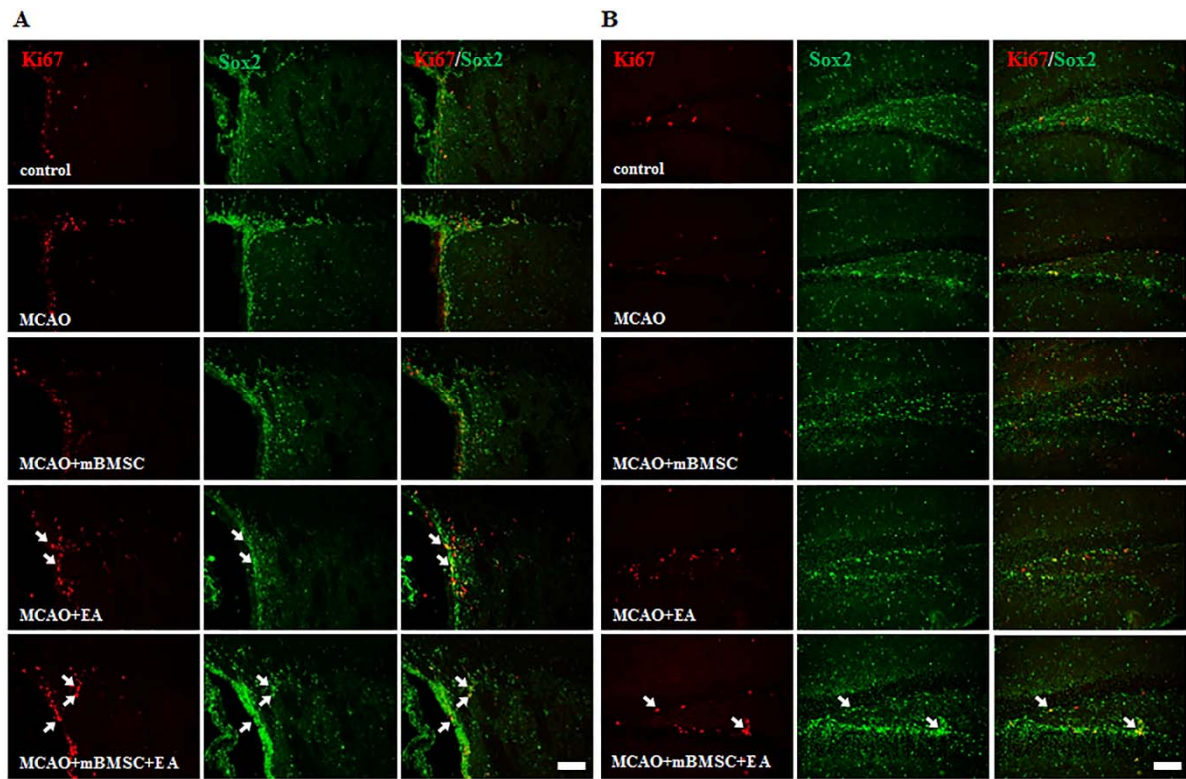

**Fig. S2. Effects of mBMSC and EA treatment on proliferation marker as detected by Ki67 and Sox2.** (A) Photomicrographs for Ki67 and Sox2 in the SVZ+striatum. (B) Photomicrographs for Ki67 and Sox2 in the hippocampus. Ki67/Sox2 double-positive cells are indicated by arrows. Scale bars=100  $\mu$ m.

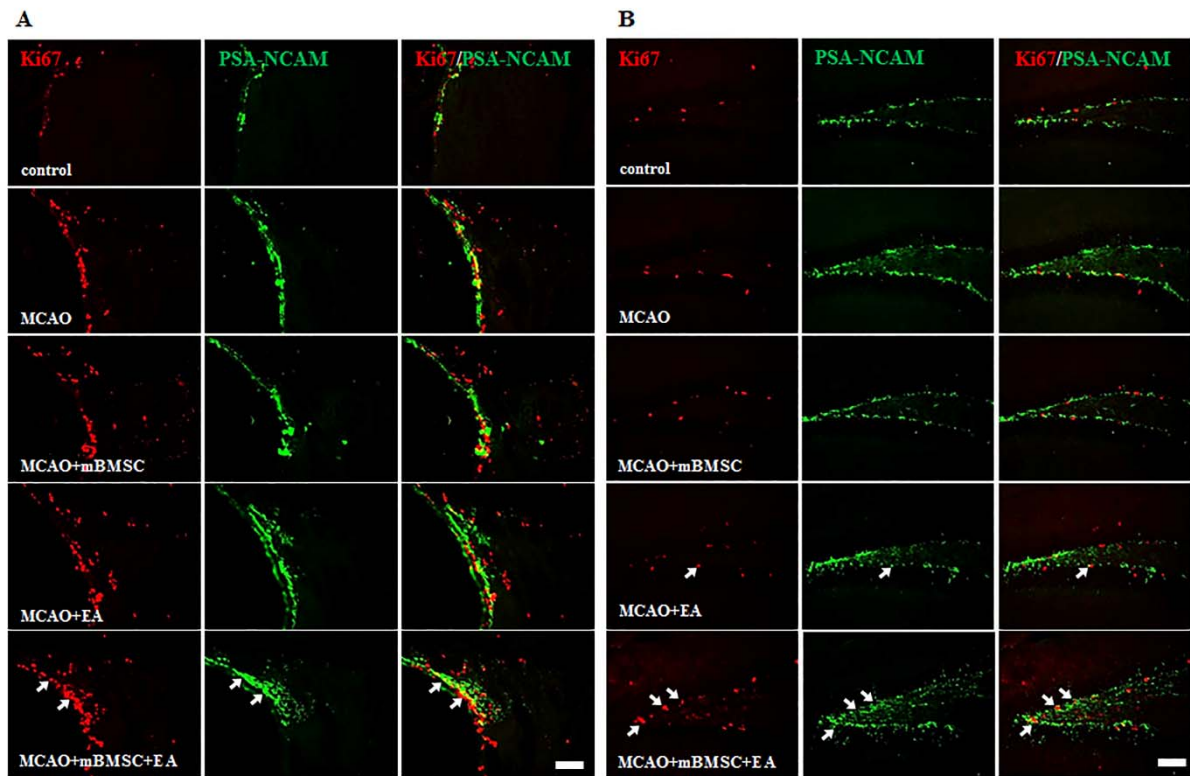

**Fig. S3. Effects of mBMSC and EA treatment on immature neuronal marker as detected by Ki67 and PSA-NCAM.** (A) Photomicrographs for Ki67 and PSA-NCAM in the SVZ+striatum. (B) Photomicrographs for Ki67 and PSA-NCAM in the hippocampus. Ki67/PSA-NCAM double-positive cells are indicated by arrows. Scale bars=100  $\mu$ m.

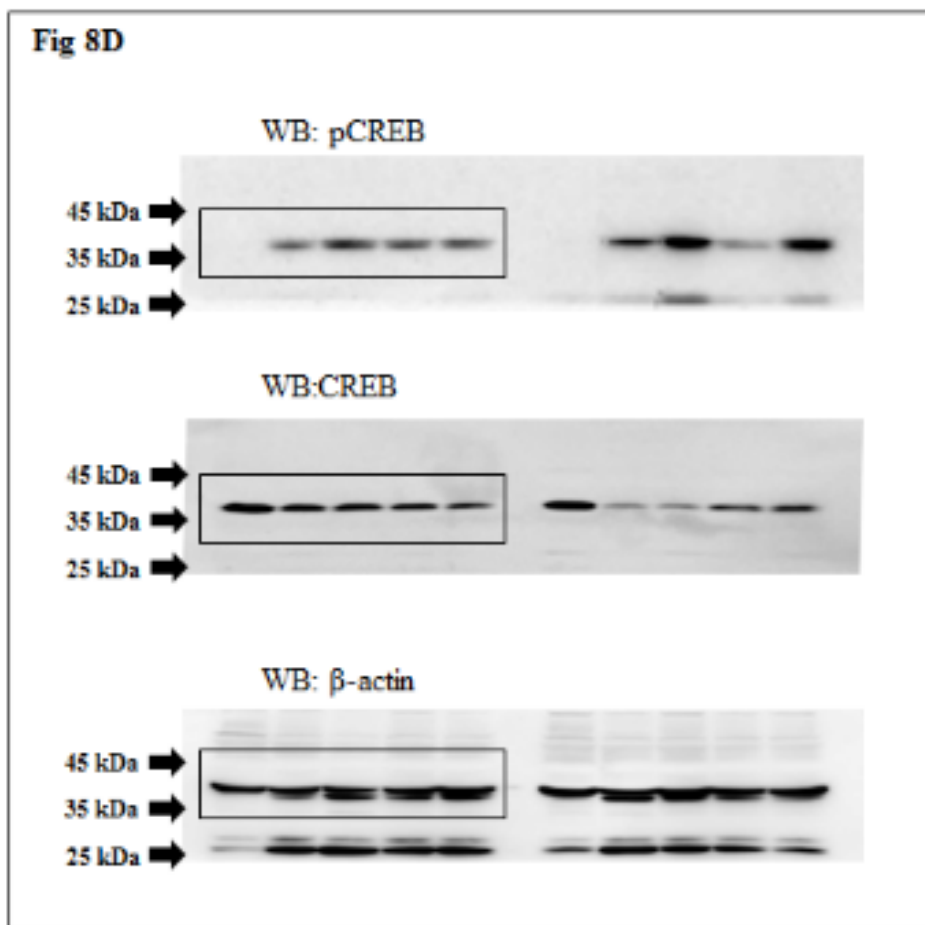

**Fig. S4.** Blot images of approximate regions used for figures marked with rectangles and molecular size marker (kDa).
